# Supplementary material for: Microbiology by numbers
Source: Springer Nature journal article supplement (doi:10.1038/nrmicro2644), 2011-08-12
Supplement: 41579_2011_BFnrmicro2644_MOESM1_ESM.pdf [file 41579_2011_BFnrmicro2644_MOESM1_ESM.pdf]

Supplementary information S1 | #microbiologybynumbers

@NatureRevMicro: If all the  $10^{31}$  viruses on earth were laid end to end, they would stretch for 100,000,000 light years

@CT\_Microbiol: 3g of botulism neurotoxin could kill all of the UK, 400g could kill the whole planet #sfamsc11

@ClaireAinsworth:  $13 \times 10^{28}$  bacteria in oceans = 100 million x more cells than stars in vis Universe <http://bit.ly/pl8HQj>  
HT @expeditionlog

RT @jtneill: "There are more microbes in a teaspoon of soil than there are people on the earth <http://bit.ly/p9KxQz>

@SCIENCE\_ETC: fantastic website at <http://bit.ly/e0n0Cd> you'll get lost in numbers

@SCIENCE\_ETC: Also <http://bit.ly/10fWQi> for a good visualisation important for big/small no.

@ClaireAinsworth: IIRC, only 4 gene difference between bact sp that causes yaws and the one that causes syphilis

@ClaireAinsworth: Gut flora genes outnumber our gene set 150-fold & own genome is 8% defunct viral DNA

@DrLizzyMoore: The est. number of new Chlamydia cases worldwide (~50mil) more than population of South Korea

@gilbertjacka: we have only sequenced 1e-22% of DNA on Earth, the EMP will increase this to 1e-20% in the next 3y

@aphilosof: viral lysis in surface waters removes 20-40% of prokaryotes each day - Suttle <http://bit.ly/mS6Yl8>

@anthilton: #microbiologybynumbers Everyone has about 1 kg in weight of bacteria in their gut.

@anthilton: Human adults excrete their own weight in faecal bacteria every year.

@phylogenomics: zero - the fraction of microbial diversity that we have sampled @microbiologybynumbers

@NatureRevMicro: The largest known contiguous fungal mycelium covered a 2,400-acre (9.7 km<sup>2</sup>) site in eastern Oregon.

@NatureRevMicro: Age of viable bacteria extracted from amber: 34,000 to 170,000 years <http://bit.ly/q5DdCq>

@NatureRevMicro: Sixteen million people worldwide die from infectious disease every year.  
(<http://www.mysciencecareer.ie/science-careers/a-career-in/microbiology>)

@cdchep: Approx. 1 in 12, or 500M people worldwide are living with chronic viral

@NatureRevMicro: Translation rate in exponentially growing haploid *S. cerevisiae*: 13,000 proteins per sec  
<http://1.usa.gov/nDayBT>

@NatureRevMicro: There are 958,980 atoms in SV40 <http://tinyurl.com/5js3bb> #microbiologybynumbers

@NatureRevMicro: Rate of viral infection in the worlds oceans:  $1e+23$  infections per second <http://bit.ly/qhGm5t>

@NatureRevMicro: ~1400 species of human pathogen, 208 viruses or prions, 538 bacteria, 317 fungi, 57 protozoa, and 287 helminths <http://www.bis.gov.uk/assets/bispartners/foresight/docs/infectious-diseases/t16.pdf>

@NatureRevMicro:  $\sim 1e+11$ : the same number of bacteria in a gram of dental plaque as there are humans that have EVER lived

@TheLancet: 10 million drug users worldwide have hepC and 1.3 million have hepB <http://bit.ly/nmyF1b>

@NatureRevMicro: Looking for some more #microbiologybynumbers and stumbled on this real time world statistics <http://bit.ly/7pFtr> some of them are staggering
